# Supplementary material for: Right Hemisphere Remapping of Naming Functions Depends on Lesion Size and Location in Poststroke Aphasia
Source: Neural Plast. 2017 Jan 12;2017:8740353. doi: 10.1155/2017/8740353 (PMC5266856; doi:10.1155/2017/8740353)
Supplement: Supplementary file 1 — Supplementary Material 1: Heat map showing left hemisphere lesion distribution for all participants in the aphasia group. Supplementary Material 2: Demographic information and performance WAB scores for each participant in the aphasia group. [file 8740353.f1.zip]

Archive with 2 entries (2 files):
- Appendix_table01_NP_1814398.xlsx
- Supplement_Figure01_NP_1814399.psd
