# Supplementary material for: Right Hemisphere Remapping of Naming Functions Depends on Lesion Size and Location in Poststroke Aphasia
Source: Neural Plast. 2017 Jan 12;2017:8740353. doi: 10.1155/2017/8740353 (PMC5266856; doi:10.1155/2017/8740353)
Supplement: Supplementary file 1 — Supplementary Material 1: Heat map showing left hemisphere lesion distribution for all participants in the aphasia group. Supplementary Material 2: Demographic information and performance WAB scores for each participant in the aphasia group. [file 8740353.f1.zip › Appendix_table01_NP_1814398.xlsx]

## Sheet: Sheet1
SubID	Age	Sex	Education	Handedness	MonthsSinceStroke	WABNamingandWordFindingSubscore	WABSpontaneousSpeechSubScore	WABAudioVerbalComprehensionSubscore	WABRepetitionSubscore	WABdiagnosis
sub01	76.3082	Male	22	70	72.6	8.2	18	8.3	6.9	conduction
sub02	45.7066	Female	18	NAN	25.6	9.4	14	8.1	6.6	conduction
sub03	65.3263	Male	18	80	46.7	6.1	9	4.6	3.3	Broca's
sub04	74.5424	Female	18	100	6.3	9.7	19	9.6	9.8	anomic
sub05	55.5111	Female	16	100	30.4	8.6	18	9.4	8.6	anomic
sub06	51.3687	Female	15	90	8.3	9.9	18	9.2	8.6	anomic
sub07	63.9602	Female	16	-100	27.4	3.6	7	6.25	4.2	Broca's
sub08	59.0676	Male	19	-79	87.6	7.7	19	9.85	9.7	anomic
sub09	54.9416	Female	16	100	29.7	3.9	13	5.3	8.1	transcortical sensory
sub10	62.3393	Male	21	80	24.8	1.6	3	4.65	2.6	Broca's
sub11	65.4908	Male	16	100	25.4	9.4	18	9.8	7.2	anomic
sub12	53.1154	Male	14	16	24.4	6	19	9.05	8.4	anomic
sub13	75.0707	Male	19	100	105.5	8.4	19	8.95	7.1	anomic
sub14	57.3182	Female	13	70	13.6	4.2	9	6.85	4	Broca's
sub15	56.8609	Male	14	80	21.9	1.7	5	8	2.5	Broca's
sub16	58.4435	Female	18	100	16.4	7.6	18	9.65	7.6	anomic
sub17	53.7287	Male	18	-100	30.3	2.2	5	5.1	1	Broca's
sub18	45.964	Male	12	70	42.9	4.4	12	8.25	5.1	Broca's
sub19	45.3754	Male	16	100	72	7.4	12	7.8	4.9	Broca's
sub20	66.4489	Male	16	50	149.1	8	18	8.05	9.3	anomic
sub21	59.3414	Male	12	50	81.9	9.1	18	9	9.4	anomic
sub22	55.188	Male	12	100	26.9	8.3	20	10	9.7	anomic
sub23	73.0337	Male	18	90	255.7	7.7	18	9.6	8.3	anomic
sub24	67.128	Male	20	100	23.2	8.3	18	8.45	9.1	anomic
sub25	63.4456	Male	20	100	137.6	9.8	19	7.4	8.4	anomic
sub26	71.1281	Female	12	100	22.1	7.3	17	8.55	4.2	conduction
sub27	64.2669	Female	18	90	60.2	2.9	10	5.95	6.2	Wernicke's
sub28	50.3856	Female	12	40	37	9.8	19	9	9.4	anomic
sub29	37.49	Male	18	100	8.7	3.8	12	7.4	2.8	Broca's
sub30	49.6767	Male	18	80	7.9	9.9	20	10	10	anomic
sub31	42.8099	Male	12	20	11.3	9.5	19	9.95	9.6	anomic
sub32	75.1884	Male	17	-100	151.2	8.6	18	9.75	8.7	anomic
sub33	72.7517	Male	18	100	47.3	5.1	8	7.65	6.1	Broca's
sub34	77.3734	Male	19	90	112.6	8.5	18	9.1	8.4	anomic
sub35	60.5298	Female	12	80	58.2	7.5	18	9.7	8.4	anomic
sub36	61.4768	Male	14	NAN	38.3	7.3	19	7.85	8.2	anomic
sub37	55.6396	Male	18	100	69	9.3	15	8.85	9.5	anomic
sub38	48.8114	Male	16	89.5	16.8	6.1	10	7.7	3.6	Broca's
sub39	60.7105	Female	18	100	36.6	8.6	18	9.85	8.8	anomic
